# Supplementary material for: Heterogeneous expression of the collagen receptor DDR1 in chronic lymphocytic leukaemia and correlation with progression
Source: PubMed Central journal article supplement (PMC5301030; doi:10.1038/bcj.2016.121), 2017-01-06
Supplement: bcj2016121x1.pdf [file bcj2016121x1.pdf]

## Supplementary information

### Figure S1

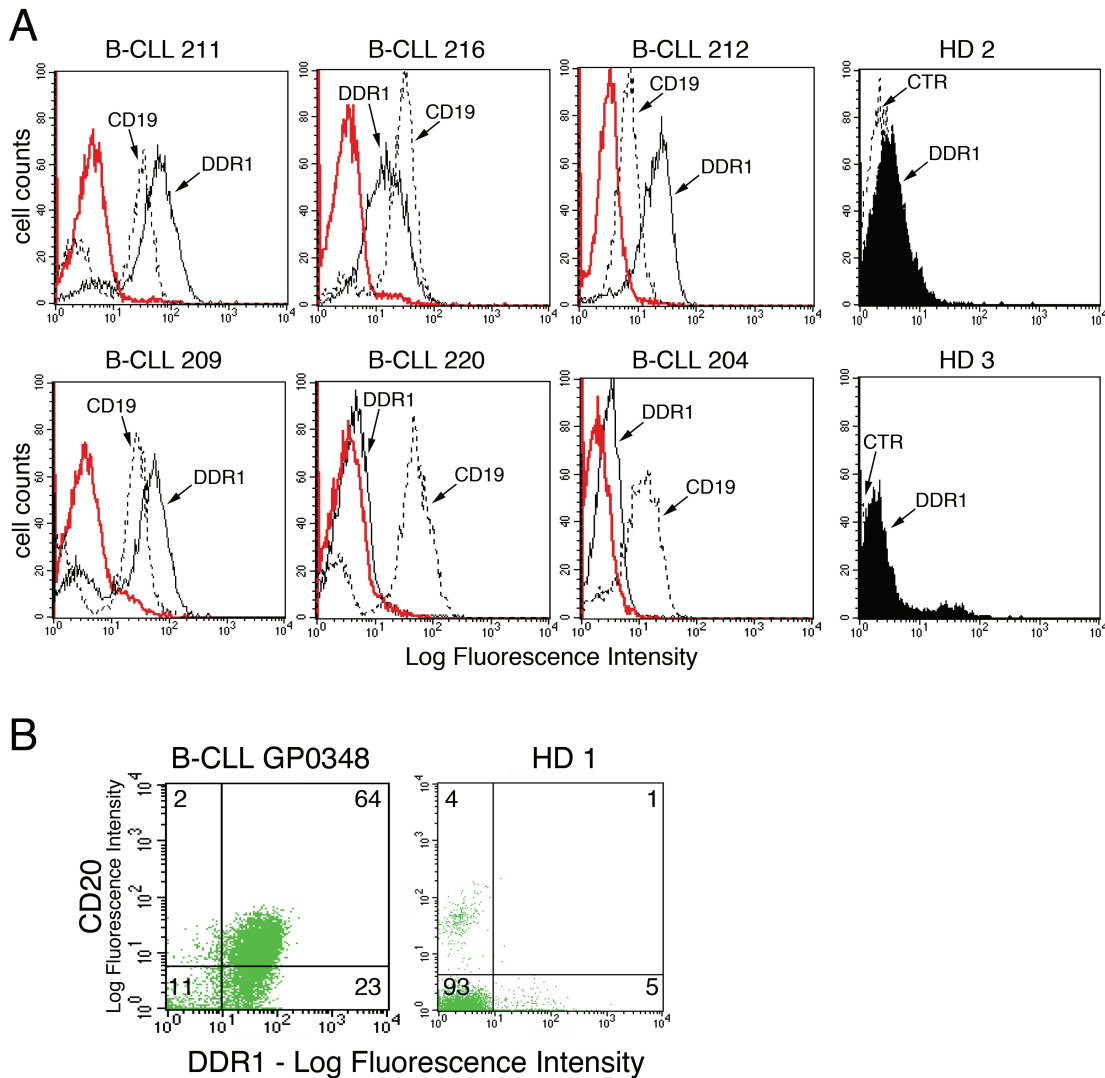

**Figure S2**

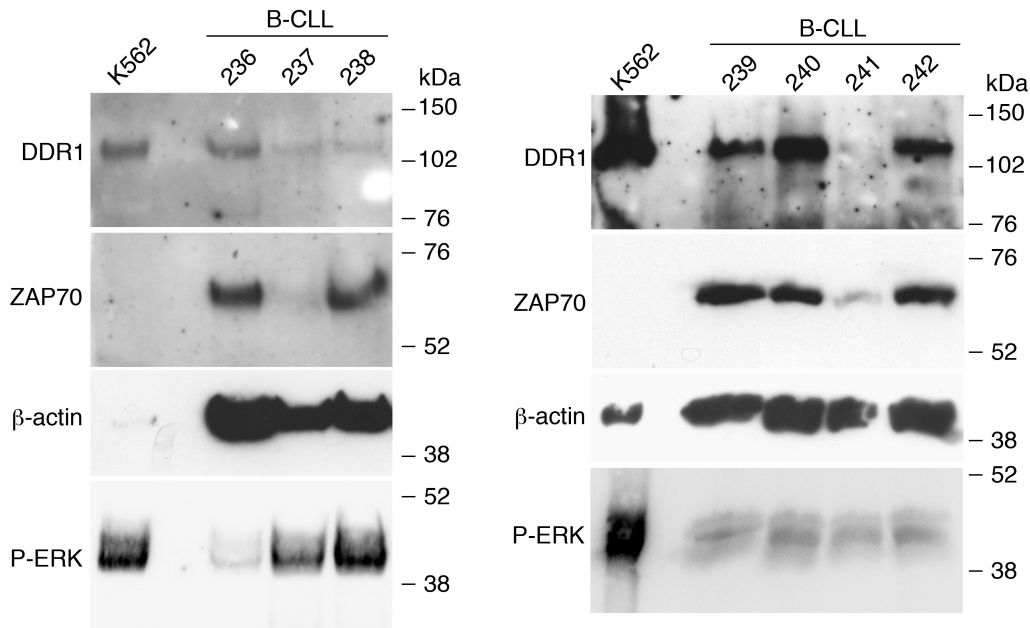

**Supplementary Figure 2:** Western blot analysis of DDR1, ZAP70 and P-ERK1/2 in 7 additional CLL cases. K562 erythroid leukemia cell line is shown as positive control and  $\beta$ -actin as loading control. Before re-probing, blots were stripped with Restore Western Blot Stripping Buffer (Thermo Fisher Scientific, Life Technologies Italia, Monza, Italy). CLL cells were lysed in 10 mM Tris-HCl pH 7.5, 1 mM EDTA, 150 mM NaCl, 1% Triton-X-100, 0.1% SDS, 1 mM sodium orthovanadate and 1 mM PMSF. Lysates were resolved by 10% SDS-PAGE under reducing conditions and analysed by Western blotting using the following antibodies: rabbit anti-DDR1 (Cell Signaling Technology, Danvers, MA), mouse anti-ZAP70 (clone 2F3.2, Upstate, Merck Millipore, Vimodrone, Italy), anti-phospho-ERK1/2 (Santa Cruz Biotechnology, Heidelberg, Germany) and anti- $\beta$  actin (Sigma-Aldrich, Milan, Italy), according to manufacturers' instructions. Proteins were detected by ECL Prime (GE Healthcare Italia, Milan, Italy) and autoradiography.

**Table S1.** Characteristics of the CLL cases analysed by Western blot.

| B-CLL case n. | CD38            | IgGVH            |
|---------------|-----------------|------------------|
| 226           | 2 <sup>a)</sup> | unmut            |
| 230           | 8               | unmut            |
| 232           | 2               | unmut            |
| 233           | 78              | unmut            |
| 234           | 5               | NA <sup>b)</sup> |
| 236           | 35              | NA               |
| 237           | 40              | unmut            |
| 238           | 7               | unmut            |
| 239           | 80              | unmut            |
| 240           | NA              | mut              |
| 241           | NA              | mut              |
| 242           | 50              | unmut            |

a) % positive cells, flow cytometry

b) NA = not available

**Table S2.** Characteristics of the CLL cases analysed by immunofluorescence.

|                     | N. of cases |
|---------------------|-------------|
| Total               | 34          |
| ZAP70 <sup>a)</sup> |             |
| ≥ 30                | 10          |
| < 30                | 13          |
| NA <sup>b)</sup>    | 11          |
| CD38                |             |
| ≥ 30                | 5           |
| < 30                | 20          |
| NA                  | 9           |
| IGVH status         |             |
| mutated             | 14          |
| un-mutated          | 11          |
| NA                  | 9           |

a) % positive cells, flow cytometry

b) NA not available
